# Supplementary material
Source: PubMed Central journal article supplement (PMC7020665)
Supplement: NIHMS1555431-supplement-BcsG_Suupl_Info.pdf [file NIHMS1555431-supplement-BcsG_Suupl_Info.pdf]

**Supplementary material**  
**to**  
**Structural and functional characterization of the BcsG subunit of**  
**the cellulose synthase in *Salmonella typhimurium***

**by**

**Lei Sun<sup>1\*</sup>, Peter Vella<sup>2\*</sup>, Robert Schnell<sup>2</sup>, Anna Polyakova<sup>3</sup>,  
Gleb Bourenkov<sup>3</sup>, Fengyang Li<sup>1</sup>, Annika Cimdins<sup>1</sup>, Thomas Schneider<sup>3</sup>, Ylva  
Lindqvist<sup>2</sup>, Michael Y. Galperin<sup>4\*\*</sup>, Gunter Schneider<sup>2\*\*</sup>, and Ute Römling<sup>1\*\*</sup>**

<sup>1</sup>Department of Microbiology, Tumor and Cell Biology, Karolinska Institutet, S-171 77, Stockholm, Sweden;

<sup>2</sup>Department of Medical Biochemistry and Biophysics, Karolinska Institutet, S-171 77, Stockholm, Sweden;

<sup>3</sup>European Molecular Biology Laboratory, D-22607 Hamburg, Germany;

<sup>4</sup>National Center for Biotechnology Information, National Library of Medicine, National Institutes of Health, Bethesda, Maryland 20894, USA

**This Supplementary Material includes 11 figures and 3 tables**

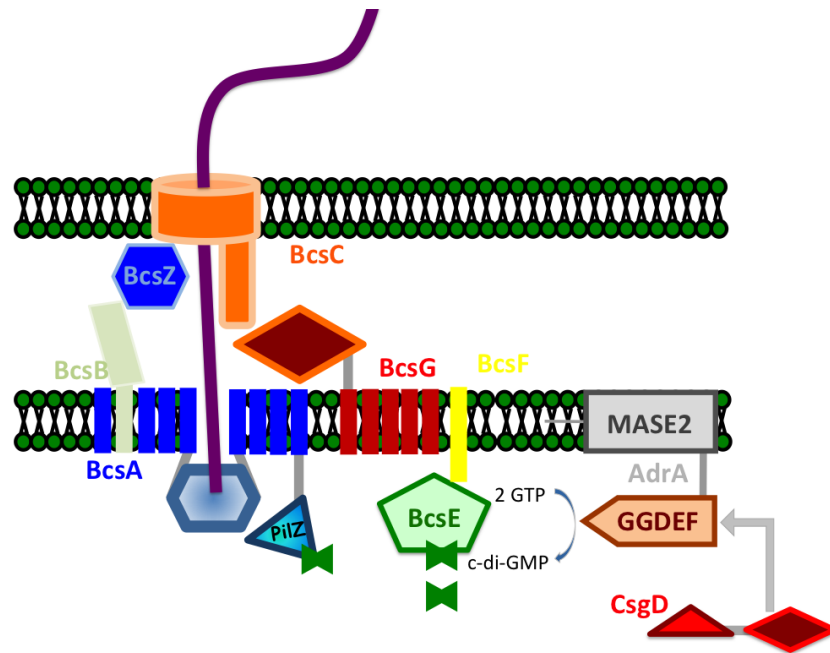

**Figure S1. Proteins involved in cellulose biosynthesis and its regulation as mentioned in this work.**

BcsA is the catalytic subunit of the cellulose synthase, which contains a C-terminal c-di-GMP binding PilZ domain and BcsB is a periplasmic protein with a C-terminal transmembrane helix required for *in vitro* cellulose biosynthesis. These two proteins constitute the active cellulose synthase [1]. BcsC is the predicted outer membrane pore and BcsZ is a periplasmic glycosyl hydrolase family 8 cellulase that reduces cellulose production [2, 3]. Accessory proteins are BcsE, a cytoplasmic c-di-GMP receptor [4], the short transmembrane protein BcsF and the alkaline phosphatase-related protein BcsG (this work, [5]). On agar plates, the orphan response regulator CsgD is required for amyloid curli and cellulose biosynthesis through activation of transcription of the diguanylate cyclase AdrA, which produces the c-di-GMP required for cellulose biosynthesis [6].

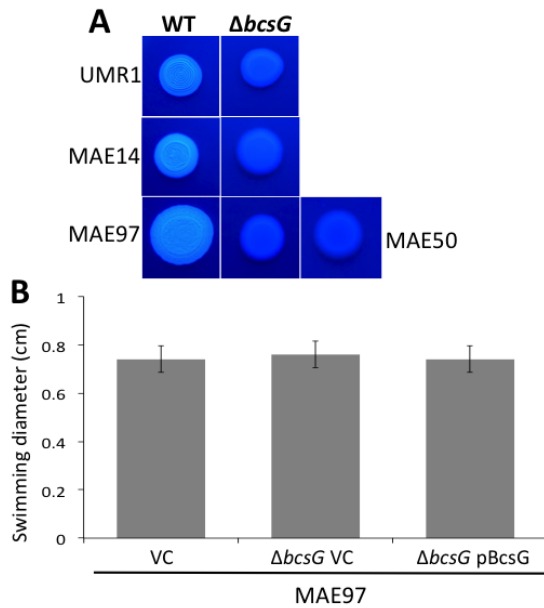

**Figure S2. Calcofluor binding and motility of *S. typhimurium* ATCC14028-1s derivatives.**

**A.** Calcofluor binding phenotypes of *S. typhimurium* strains UMR1 (cellulose<sup>+</sup>/curli<sup>+</sup>, 28 °C), MAE14 (cellulose<sup>+</sup>/curli<sup>-</sup>, 28 °C) and MAE97 (cellulose<sup>+</sup>/curli<sup>-</sup>, 28 °C/37 °C) and their respective  $\Delta bcsG$  deletion mutants, observed using Calcofluor white fluorescence. Strain MAE50 ( $\Delta csgD$ ) served as a negative control. Cells were grown on salt-free LB agar plates with 50  $\mu$ g/ml Calcofluor at 28 °C for 48 h. Wild type and mutant colonies are from the same plate.

**B.** Swimming motility of MAE97, its  $\Delta bcsG$  mutant and the  $\Delta bcsG$  mutant complemented with BcsG expressed from a plasmid (pBcsG). The swimming diameter was measured after 5 h of incubation on an LB agar plate with 0.3% agar at 28 °C.

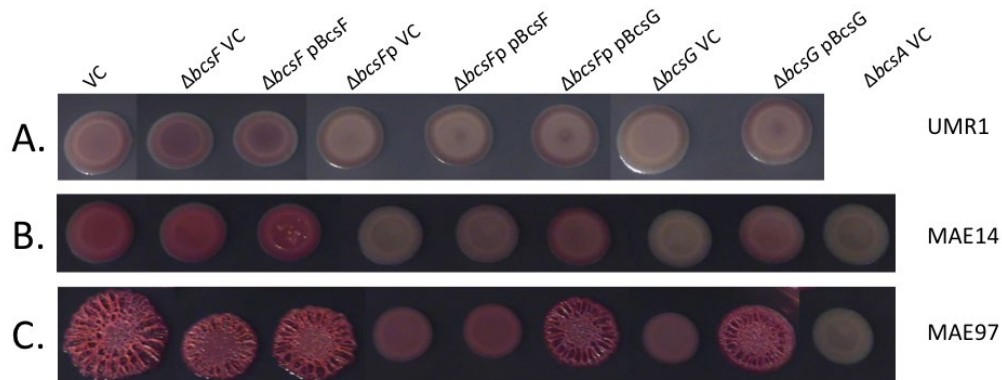

**Figure S3. Colony morphotypes of polar and non-polar *bcsF* deletion mutants in *S. typhimurium* ATCC14028-1s derivatives.**

Colony morphotypes of *S. typhimurium* strains UMR1 (cellulose<sup>+</sup>/curli<sup>+</sup>, 28 °C) (A), MAE14 (cellulose<sup>+</sup>, 28 °C) (B) and MAE97 (cellulose<sup>+</sup>, 28/37 °C) (C). The non-polar ( $\Delta bcsF$ ) deletion mutants show a slightly reduced colony morphotype, which can be rescued by the expression of plasmid-borne *bcsF*. The polar ( $\Delta bcsFp$ ) deletion mutants show a severely reduced colony morphotype resembling a *bcsG* mutant, which cannot be complemented by *bcsF* plasmid expression, but can be overcome by *bcsG* expression.

Vector control (VC) is plasmid pBAD30. pBcsF is wild-type *bcsF* with a C-terminal 6xHis-tag cloned in pBAD30. pBcsG is wild-type *bcsG* with a C-terminal 8xHis-tag cloned in pBAD30.  $\Delta bcsA$  strain was used as negative control. Cells were grown on salt-free LB agar plates containing Congo red for 24 h at 28 °C. See Table S2 for the complete genotypes.

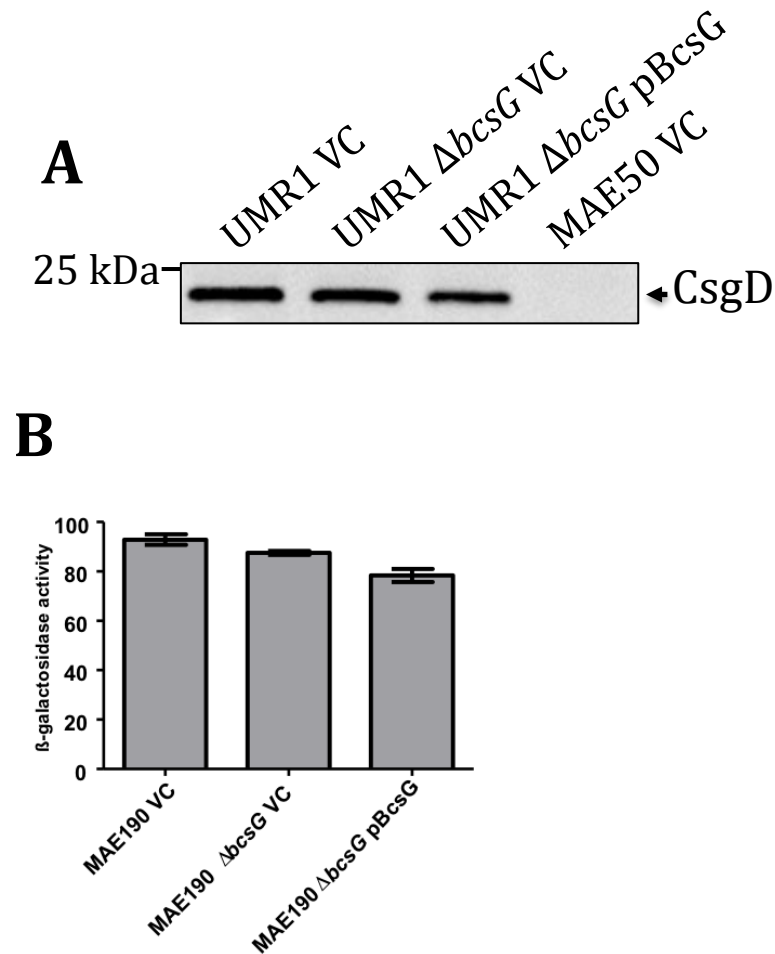

**Figure S4. Production of the *rdar* biofilm activator CsgD and expression of the cellulose synthase BcsA are not regulated by BcsG.**

**A.** Expression of CsgD in *S. typhimurium* UMR1 upon deletion or overexpression of *bcsG*. Cells were grown on salt-free LB agar for 24 h at 28 °C. VC indicates vector control pBAD30; pBcsG, wild-type *bcsG* cloned in pBAD30 with a C-terminal 8xHis tag. MAE50 is a *csgD* deletion mutant used as negative control. Western blot analysis with anti-CsgD antiserum (1:5000 dilution) has been performed as described [6].

**B.** Transcription of the *bcsA* gene encoding the cellulose synthase catalytic subunit is not affected by deletion or overexpression of *bcsG* as measured by  $\beta$ -galactosidase activity expressed from a *bcsA*::MudJ fusion construct. Cells were grown on salt-free LB agar for 24 h at 28 °C and resuspended in cold working buffer adjusted to OD<sub>600</sub>=0.1. MAE190 contains a *bcsA101*::MudJ insertion in strain MAE97. VC and pBcsG constructs are as in panel A. See Table S2 for the complete genotypes.



**A.** Alignment of the N-terminal membrane portion and the linker region of BcsG proteins from *S. typhimurium* and other bacteria. Uncharged residues are shaded yellow, conserved aromatic residues forming a predicted 'aromatic belt' along the membrane surface [7] are in bold, Arg and Lys are in blue, Asp and Glu are in red. Conserved Lys31 and Asp82 in the hydrophobic core are marked with asterisks. The proteins are listed under their UniProt accession codes and abbreviated names of the respective genera. The source sequences are as follows: *Yersinia enterocolitica* LC20\_00134 (GenBank accession number AHM71390); *Erwinia billingiae* EbC\_43970 (CAX61928); *Klebsiella pneumoniae* KPN\_03888 (ABR79275); *Proteus mirabilis* PMI2096 (CAR44189); *Serratia proteamaculans* Spro\_0143 (ABV39253); *Pseudoalteromonas haloplanktis* PSHAa2158 (CAI87214); *Shewanella violacea* SVI\_0134 (BAJ00105); *Vibrio fischeri* VF\_A0887 (AAW87957); *Photobacterium profundum* PBPRA1716 (CAG20123); *Frateuria aurantia* Fraau\_2360 (AFC86727); *Pseudomonas stutzeri* PST\_0283 (ABP77989); *Pseudomonas putida* PP\_2632 (AAN68240); *Chromobacterium violaceum* CV\_2673 (AAQ60343); *Sutterella wadsworthensis* BN489\_01704 (CCZ17195); *Leptothrix cholodnii* Lcho\_2073 (ACB34340); *Burkholderia pseudomallei* BPSS1576 (CAH39049), and *Cupriavidus metallidurans* Rmet\_2257 (ABF09136).

**B.** Predicted membrane topology of BcsG drawn by Protter (<http://wlab.ethz.ch/protter/>, [8]). Positions of the intramembrane Lys31 and Asp82 are marked with blue and red circles, respectively.

**C.** Alignment of the membrane portions of *S. typhimurium* BcsG protein and lipid A phosphoethanolamine transferase from *Neisseria meningitidis* (NmEptA, PDB entry 5FGN [7]). The alignment was constructed based on the results of an HHpred [9] search and reconciling the predicted secondary structures and membrane topologies of the two proteins. Coloring is as in panel A, secondary structure elements (predicted for BcsG and derived from the 5FGN structure using the DSSP algorithm [10]) are as follows: H,  $\alpha$ -helix; E,  $\beta$ -strand; C, coil; T, turn. Identical residues are marked with asterisk, similar residues with the plus signs.

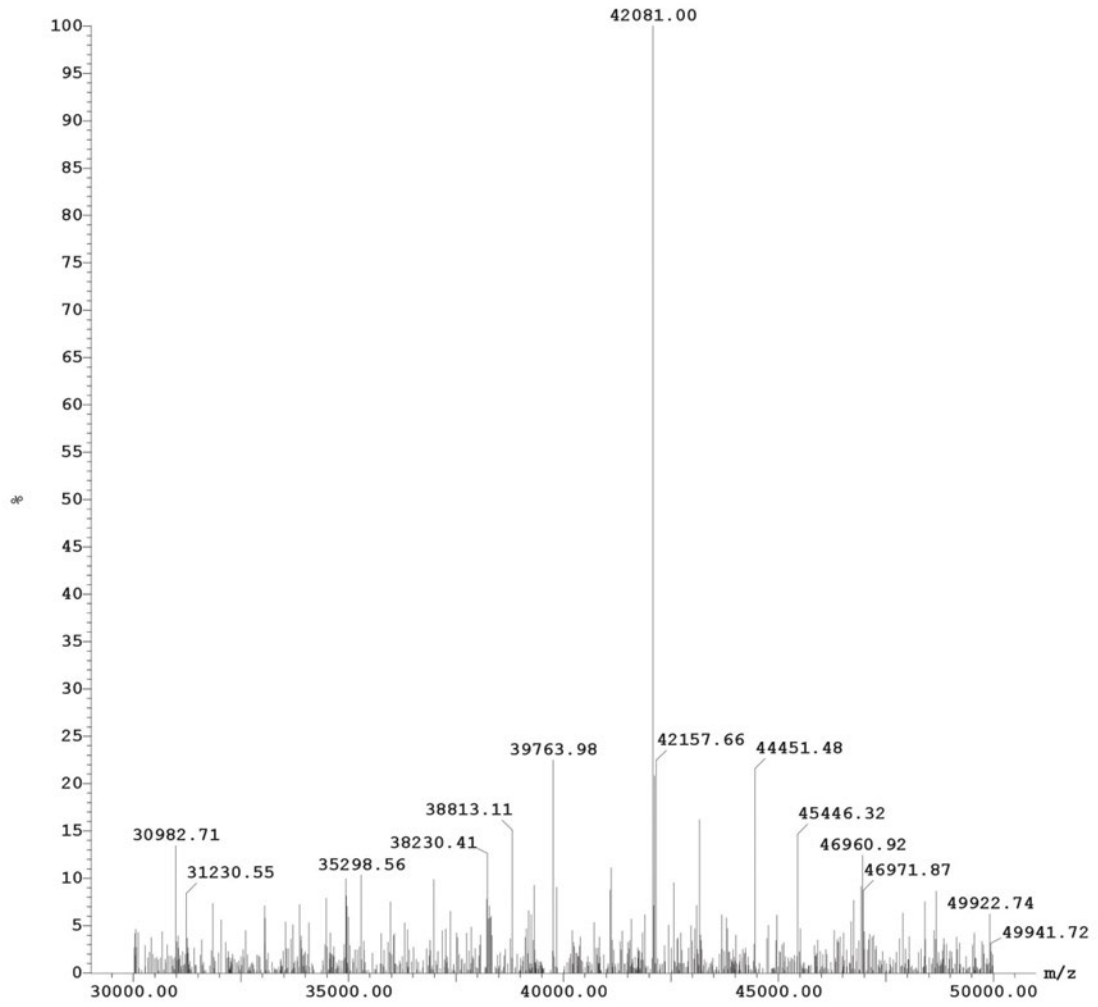

**Figure S6. Mass-spectrum of the purified BcsG construct after cleavage with factor Xa.**



**A**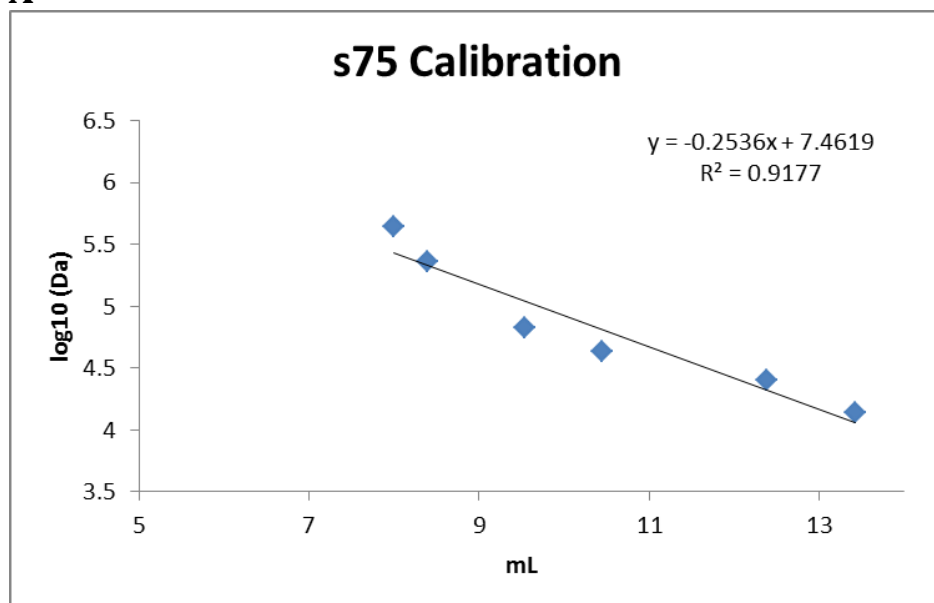**B**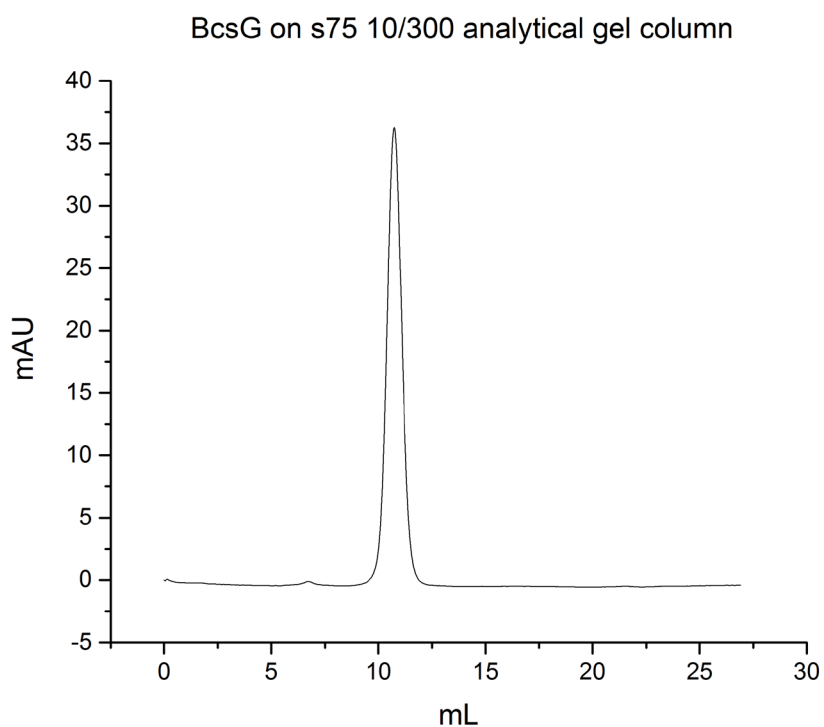

**Figure S7. Analytical gel chromatography of the purified BcsG construct after tag cleavage used in the crystallization experiments.**

**A.** Calibration curve obtained with ribonuclease-A (13.7 kDa), chymotrypsinogen-A (25 kDa), ovalbumin (43 kDa), albumin (67 kDa), catalase (232 kDa), ferritin (440 kDa) and Blue Dextran (2 MDa).

**B.** Elution profile of purified BcsG. BcsG elutes as a monomer.

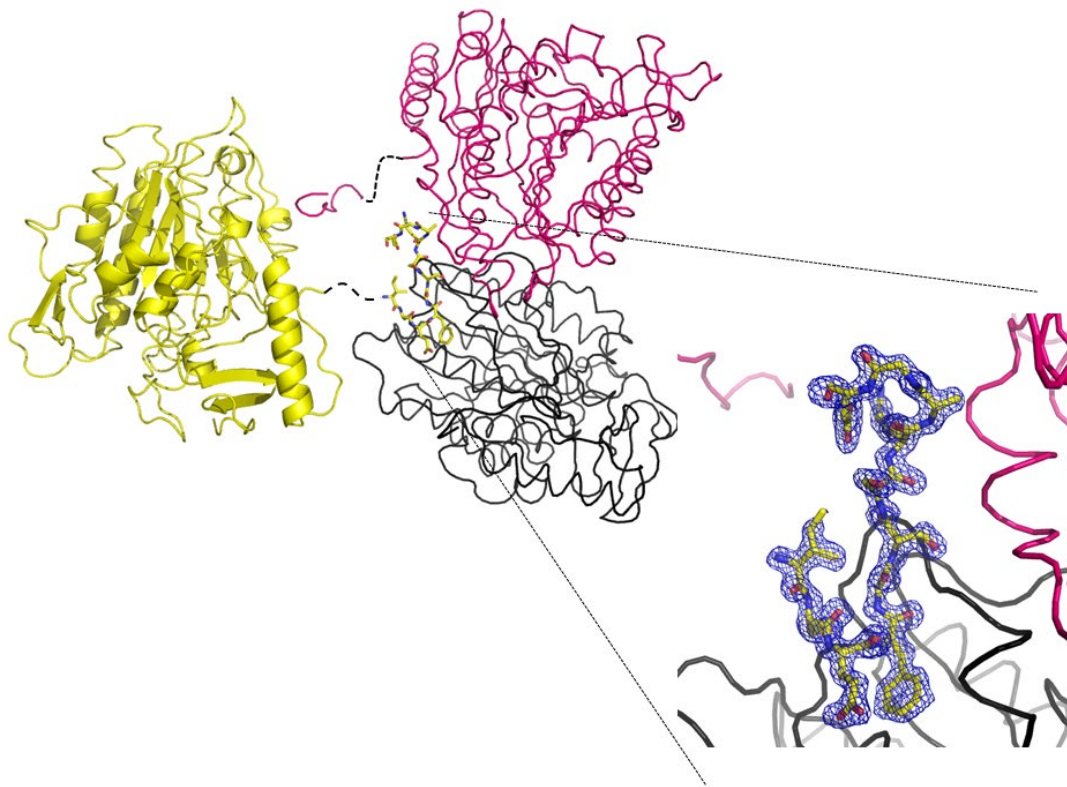

**Figure S8. Crystal packing interactions of the tag-derived linker peptide with a neighboring BcsG molecule in the crystal lattice.** Part of the 2Fo-Fc electron density map, contoured at  $1.5 \sigma$ , at the position of the bound peptide derived from the maltose binding protein tag is shown. The side chain of linker residue Phe4 is buried into a small pocket of the neighboring BcsG molecule and forms van-der-Waals interactions with the aliphatic parts of the side chains of Arg503 and Lys519. Other important interactions are made through hydrogen bonds of the carbonyl oxygen atom of Phe4 with the peptide amide group of Asn516, the amide nitrogen and side chain hydroxyl group of the linker Ser6 residue with the side chain of Glu512, and the amide nitrogen atom of linker Ser2 residue with the carbonyl oxygen atom of Ser514. In total, this packing interface contributes with  $300 \text{ \AA}^2$  of buried surface area to the packing interactions between two symmetry related molecules.

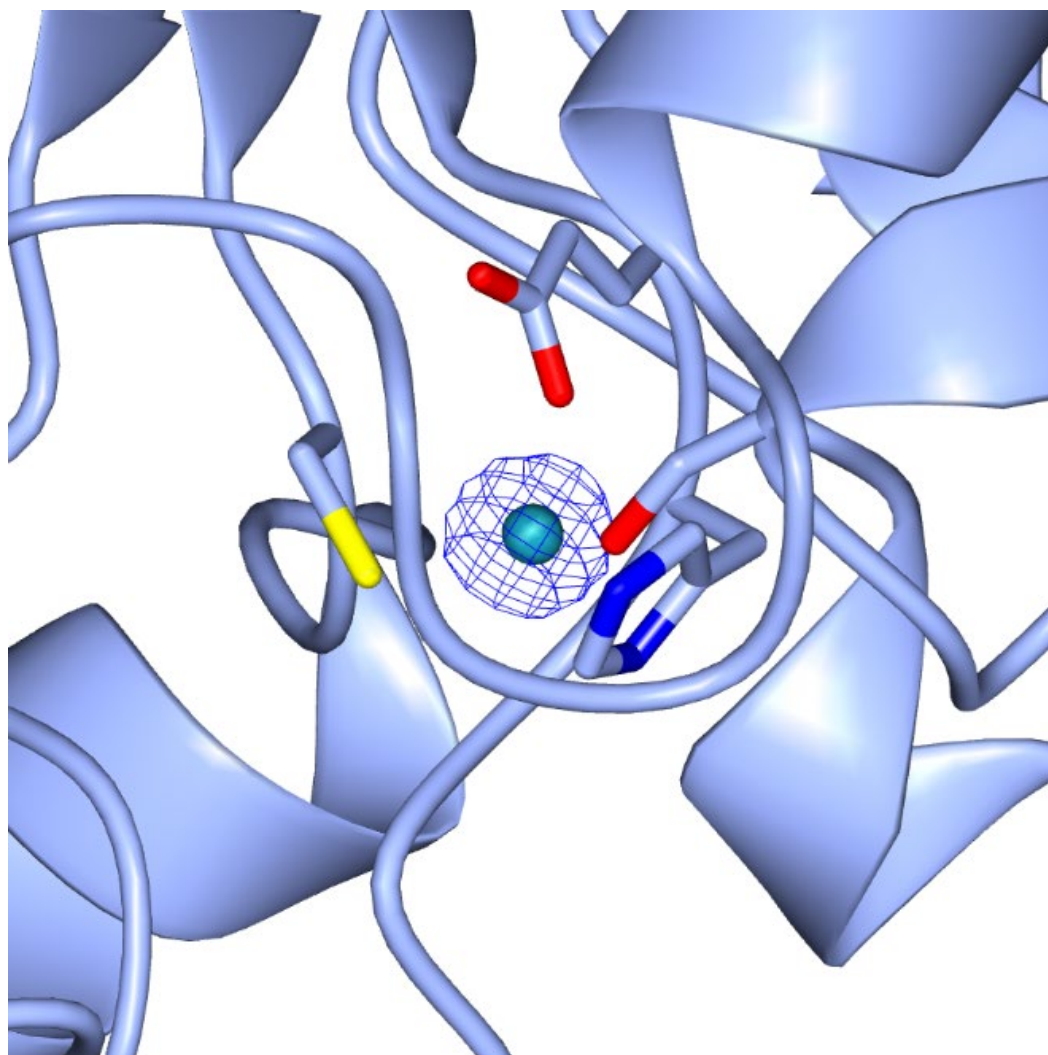

**Figure S9.** Anomalous difference electron density map at the metal binding site of BcsG contoured at  $15\sigma$ , demonstrating that the bound metal in this site is a  $\text{Zn}^{2+}$  ion. The electron density map was calculated based on the X-ray data collected at the absorption edge of  $\text{Zn}^{2+}$  ( $\lambda = 1.278 \text{ \AA}$ ).

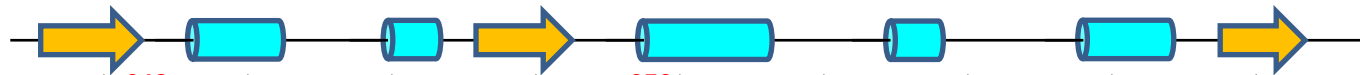

|                         |     |         |      |      |        |         |       |       |      |      |       |       |       |       |       |       |      |       |      |      |       |   |   |   |   |    |    |    |     |     |     |   |   |   |   |   |   |     |   |   |   |   |   |   |   |   |   |   |   |   |   |   |   |   |   |   |   |   |   |   |   |   |   |   |   |   |   |   |   |   |   |   |   |   |   |   |   |   |   |     |   |   |   |   |     |     |     |     |     |     |
|-------------------------|-----|---------|------|------|--------|---------|-------|-------|------|------|-------|-------|-------|-------|-------|-------|------|-------|------|------|-------|---|---|---|---|----|----|----|-----|-----|-----|---|---|---|---|---|---|-----|---|---|---|---|---|---|---|---|---|---|---|---|---|---|---|---|---|---|---|---|---|---|---|---|---|---|---|---|---|---|---|---|---|---|---|---|---|---|---|---|---|-----|---|---|---|---|-----|-----|-----|-----|-----|-----|
| <a href="#">BcsG St</a> | 234 | PFDLLV  | INIC | CSLS | WSDVEA | AAGLMSH | PLWSH | EDILF | KHFN | SGT  | SGPAA | IRLLR | RASCG | QPSH  | TRLYQ | PANNE | CYLF | DNLAK | L    | GF   | TQHL  | L | M | D | H | N  | G  | E  | 328 |     |     |   |   |   |   |   |   |     |   |   |   |   |   |   |   |   |   |   |   |   |   |   |   |   |   |   |   |   |   |   |   |   |   |   |   |   |   |   |   |   |   |   |   |   |   |   |   |   |   |     |   |   |   |   |     |     |     |     |     |     |
| <a href="#">BcsG Ec</a> | 234 | PFELLV  | INIC | CSLS | WSDIEA | AAGLMSH | PLWSH | EDIEF | KNFN | SATS | SGPAA | IRLLR | RASCG | QTSHT | NLYQ  | PANNC | CYLF | DNLSK | L    | GF   | TQHL  | L | M | G | H | N  | G  | N  | Q   | 328 |     |   |   |   |   |   |   |     |   |   |   |   |   |   |   |   |   |   |   |   |   |   |   |   |   |   |   |   |   |   |   |   |   |   |   |   |   |   |   |   |   |   |   |   |   |   |   |   |   |     |   |   |   |   |     |     |     |     |     |     |
| <a href="#">BcsG Cv</a> | 202 | GFDVLL  | LHV  | CSLS | WDDLRA | VGF     | DNPL  | LARE  | DIVF | DRFN | SAASY | SGPAA | LRVLR | RASCG | QPRHS | ALYEP | PAPE | QCFL  | FENL | AKAG | FKTEL | S | L | N | H | D  | G  | S  | 296 |     |     |   |   |   |   |   |   |     |   |   |   |   |   |   |   |   |   |   |   |   |   |   |   |   |   |   |   |   |   |   |   |   |   |   |   |   |   |   |   |   |   |   |   |   |   |   |   |   |   |     |   |   |   |   |     |     |     |     |     |     |
| <a href="#">PF11658</a> | 193 | PFDLLV  | LNI  | CSLS | WDDLDA | AGLRNH  | PLWKR | EDIVF | DNFN | SATS | SGPAA | IRLLR | RASCG | QPSHS | SDLYQ | PAPQC | CYLF | DNLAK | L    | GF   | TQQL  | L | M | N | H | D  | G  | H  | 287 |     |     |   |   |   |   |   |   |     |   |   |   |   |   |   |   |   |   |   |   |   |   |   |   |   |   |   |   |   |   |   |   |   |   |   |   |   |   |   |   |   |   |   |   |   |   |   |   |   |   |     |   |   |   |   |     |     |     |     |     |     |
| <a href="#">3lxq Vp</a> | 85  | RKNLVIL | LQ   | ESL  | GAQFV  | GS      | GLG   | 2LT   | PNL  | DEL  | 4WQ   | FTQ   | X     | YAT   | G     | TR    | S    | VRG   | IEAV | T    | G     | F | P | P | S | P  | S  | R  | A   | 3   | 185 |   |   |   |   |   |   |     |   |   |   |   |   |   |   |   |   |   |   |   |   |   |   |   |   |   |   |   |   |   |   |   |   |   |   |   |   |   |   |   |   |   |   |   |   |   |   |   |   |     |   |   |   |   |     |     |     |     |     |     |
| <a href="#">4uop Lm</a> | 57  | GKNLIIV | QLE  | ESF  | QRNLT  | NV      | KIN   | 3IT   | P    | LDG  | 6SN   | QFF   | Q     | T     | V     | S     | K    | S     | N    | T    | A     | D | A | E | W | S  | V  | Y  | T   | S   | T   | F | P | S | G | Y | 2 | 159 |   |   |   |   |   |   |   |   |   |   |   |   |   |   |   |   |   |   |   |   |   |   |   |   |   |   |   |   |   |   |   |   |   |   |   |   |   |   |   |   |   |     |   |   |   |   |     |     |     |     |     |     |
| <a href="#">5i5d St</a> | 259 | GQNVLL  | ITV  | D    | GLN    | YSR     | F     | E     | K    | ---  | Q     | M     | E     | L     | A     | T     | F    | 4I    | D    | F    | T     | R | H | X | S | S  | G  | N  | T   | 2   | D   | N | G | I | F | G | L | F   | Y | G | - | I | S | P | G | Y | D | - | - | V | L | S | T | R | T | P | A | A | L | I | T | A | L | N | Q | Q | G | Y | Q | L | G | L | F | S | S | D | G | - | - | 348 |   |   |   |   |     |     |     |     |     |     |
| <a href="#">4upl Sp</a> | 17  | VMNILF  | I    | M    | F      | D       | Q     | L     | R    | W    | D     | Y     | L     | S     | C     | Y     | G    | H     | 3N   | T    | P     | H | I | D | R | L  | 4V | R  | F   | D   | R   | A | I | Q | S | P | I | C   | G | S | S | R | M | S | T | Y | T | G | R | V | H | S | H | G | A | 3 | G | I | P | L | K | V | G | E | M | T | M | G | D | H | L | R | A | A | G | M | G | C | W | L   | V | G | - | - | -   | -   | 113 |     |     |     |
| <a href="#">5g2t Bt</a> | 23  | KPNFLI  | I    | Q    | C      | D       | H     | L     | T    | Q    | R     | V     | V     | G     | A     | Y     | G    | Q     | 4T   | L    | P     | I | D | E | V | A  | 3V | I  | F   | S   | N   | A | Y | V | G | C | P | L   | S | Q | P | S | R | A | L | W | S | G | M | P | H | Q | T | N | V | R | S | N | S | E | P | V | N | P | T | L | G | S | L | F | S | E | S | G | Y | E | A | V | H | F   | G | K | - | - | -   | -   | 125 |     |     |     |
| <a href="#">2w8d Bc</a> | 31  | GKNVIY  | V    | S    | L      | E       | S     | L     | Q    | S    | F     | I     | I     | D     | Y     | K     | I    | D     | 3V   | T    | P     | F | L | N | K | I  | 8F | D  | N   | F   | F   | H | Q | T | G | Q | G | K   | T | S | D | A | E | F | X | X | E | N | S | L | Y | P | L | A | Q | G | S | 2 | V | N | K | A | Q | N | T | L | Q | S | V | P | A | I | L | K | S | K | N | Y | T | S   | A | T | F | H | G   | N   | T   | Q   | T   | 135 |
| <a href="#">4uor Lm</a> | 60  | GKNVIY  | I    | H    | L      | E       | S     | F     | Q    | Q    | F     | L     | V     | N     | Y     | K     | L    | N     | 3V   | T    | P     | F | I | N | S | E  | F  | K  | D   | Q   | N   | T | L | S | 3 | G | Q | G   | K | T | A | D | S | E | M | L | L | E | N | S | L | Y | G | L | P | Q | G | S | 2 | T | T | K | Q | N | T | Y | E | S | A | S | A | I | L | G | Q | Q | Y | T | S | A   | V | F | H | G | N   | Y   | K   | S   | 164 |     |
| <a href="#">5lrn Ec</a> | 21  | PRLVVF  | V    | V    | V      | G       | E     | T     | A    | R    | A     | D     | H     | V     | S     | F     | N    | G     | 3T   | F    | P     | Q | L | A | K | I  | 3T | N  | F   | S   | N   | V | T | S | C | G | T | S   | T | A | Y | S | V | P | C | M | F | S | Y | L | G | A | D | E | Y | D | - | - | - | V | D | T | A | K | Y | Q | E | N | V | L | D | T | L | D | R | L | G | V | S | I   | L | W | R | D | N   | S   | D   | S   | 116 |     |
| <a href="#">4tn0 Cj</a> | 17  | KKLLVL  | V    | V    | V      | G       | E     | T     | A    | R    | A     | A     | N     | Y     | S     | L     | G    | G     | 3D   | T    | N     | F | Y | T | K | 3V | F  | F  | D   | N   | F   | S | S | C | G | T | A | V   | S | L | P | C | M | F | S | I | S | K | R | E | N | Y | S | - | - | - | - | - | - | S | E | F | Q | E | N | A | M | D | V | L | Y | K | T | G | V | D | A | A | F | D   | N | N | S | G | 110 |     |     |     |     |     |
| <a href="#">4kay Ng</a> | 22  | RRFVVL  | V    | V    | V      | G       | E     | T     | T    | R    | A     | A     | N     | W     | L     | N     | G    | Y     | 3T   | T    | P     | L | L | A | A | R  | 4V | N  | F   | P   | Q   | V | R | S | C | G | T | A   | H | S | L | P | C | M | F | S | T | F | D | R | T | D | Y | D | - | - | E | I | K | A | E | H | Q | D | N | L | L | D | I | V | Q | R | A | G | V | E | V | T | W | L   | E | N | D | S | G   | 117 |     |     |     |     |
| <a href="#">5mx9 Ec</a> | 21  | PRLVVF  | V    | V    | V      | G       | E     | T     | A    | R    | A     | D     | H     | V     | S     | F     | N    | G     | 3T   | F    | P     | Q | L | A | K | I  | 3T | N  | F   | S   | N   | V | T | S | C | G | T | S   | T | A | Y | S | V | P | C | M | F | S | Y | L | G | A | D | E | Y | D | - | - | - | V | D | T | A | K | Y | Q | E | N | V | L | D | T | L | D | R | L | G | V | G | I   | L | W | R | D | N   | -   | -   | 113 |     |     |
| <a href="#">5grr Ec</a> | 21  | PRLVVF  | V    | V    | V      | G       | E     | T     | A    | R    | A     | D     | H     | V     | S     | F     | N    | G     | 3T   | F    | P     | Q | L | A | K | I  | 3T | N  | F   | S   | N   | V | T | S | C | G | T | S   | T | A | Y | S | V | P | C | M | F | S | Y | L | G | A | D | E | Y | D | - | - | - | V | D | T | A | K | Y | Q | E | N | V | L | D | T | L | D | R | L | G | V | S | I   | L | W | R | D | N   | -   | -   | 113 |     |     |
| <a href="#">lfsu Hs</a> | 3   | PHHLV   | F    | L    | L      | A       | D     | D     | L    | G    | W     | N     | D     | V     | G     | F     | H    | G     | S    | 2R   | T     | P | H | L | D | A  | L  | 3G | V   | L   | L   | D | N | Y | T | Q | P | L   | X | T | P | S | R | S | Q | L | L | T | G | R | Y | Q | I | R | T | G | L | 9 | P | S | C | V | L | D | E | K | L | P | Q | L | K | E | A | G | Y | T | T | H | M | V   | G | K | W | H | L   | G   | 108 |     |     |     |
| <a href="#">lauk Hs</a> | 2   | PNIVL   | I    | F    | A      | D       | D     | L     | G    | Y    | G     | D     | L     | G     | C     | Y     | H    | 3T    | T    | P    | N     | L | D | Q | L | 4R | F  | T  | D   | F   | Y   | V | P | V | S | L | X | T   | P | S | R | A | A | L | L | T | G | R | L | P | V | R | M | G | M | 9 | R | G | G | L | P | L | E | E | V | T | V | A | E | V | L | A | R | G | Y | L | T | G | M | A   | G | K | W | H | L   | G   | 109 |     |     |     |
| <a href="#">lei6 Pf</a> | 15  | SAPTIV  | I    | C    | V      | D       | G     | C     | E    | Q    | E     | Y     | I     | N     | Q     | A     | I    | 2Q    | A    | P    | F     | L | A | E | L | 3G | T  | V  | L   | T   | G   | D | 2 | V | P | S | F | T   | N | P | N | L | S | I | V | T | G | A | P | P | S | V | H | G | 1 | 7 | N | D | A | K | Y | L | R | A | P | T | I | L | A | E | M | A | K | A | G | Q | L | V | A | V   | T | A | K | D | K   | -   | 127 |     |     |     |
| <a href="#">ly6v Ec</a> | 42  | AKNIIL  | L    | I    | G      | D       | G     | M     | G    | D    | S     | E     | I     | T     | A     | A     | R    | N     | 7F   | F    | K     | G | I | D | A | L  | PL | T  | G   | Q   | Y   | T | H | 1 | 2 | V | T | D   | S | A | A | S | A | T | A | W | S | T | G | V | K | T | Y | N | G | A | L | G | V | D | I | H | E | K | D | H | P | T | I | L | E | M | A | K | A | A | G | L | A | T   | G | N | V | S | T   | A   | E   | L   | Q   | 152 |
| <a href="#">PF00884</a> | 1   | -PNVVL  | V    | L    | V      | L       | G     | E     | S    | L    | R     | A     | P     | D     | L     | G     | L    | Y     | 3T   | T    | P     | F | L | D | R | L  | 3G | L  | L   | F   | S   | N | F | 2 | G | G | L | T   | A | P | S | R | F | A | L | L | T | G | L | P | P | H | N | F | G | S | 4 | P | I | G | L | P | R | T | E | P | S | L | P | D | L | L | K | R | A | G | Y | N | T | G   | A | I | G | K | W   | H   | L   | G   | 102 |     |

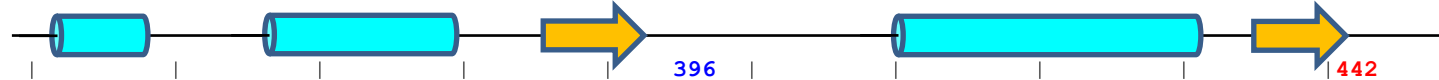

|                         |     |       |   |   |   |   |   |   |   |    |    |   |   |   |   |   |   |   |   |   |   |   |   |   |   |   |   |   |   |   |   |   |   |   |   |   |   |   |   |   |   |   |   |   |   |   |   |   |   |   |   |   |   |   |   |   |   |   |   |   |   |   |   |   |   |   |   |   |   |   |   |   |   |   |   |   |   |   |   |   |   |   |   |   |   |   |   |   |   |   |   |     |   |     |     |
|-------------------------|-----|-------|---|---|---|---|---|---|---|----|----|---|---|---|---|---|---|---|---|---|---|---|---|---|---|---|---|---|---|---|---|---|---|---|---|---|---|---|---|---|---|---|---|---|---|---|---|---|---|---|---|---|---|---|---|---|---|---|---|---|---|---|---|---|---|---|---|---|---|---|---|---|---|---|---|---|---|---|---|---|---|---|---|---|---|---|---|---|---|---|---|-----|---|-----|-----|
| <a href="#">BcsG St</a> | 329 | FGGFL | K | E | V | R | E | N | G | G  | 22 | V | Y | D | D | L | A | V | L | N | R | W | L | T | G | E | E | R | A | N | S | R | S | A | T | F | N | L | L | P | L | H | D | N | H | F | P | G | V | S | K | T | A | D | Y | K | I | R | A | Q | K | L | F | D | E | L | D | A | F | F | T | E | L | E | K | S | G | R | K | V | M | V | V | V | V | P | E | H | G | G | A | L   | K | 448 |     |
| <a href="#">BcsG Ec</a> | 329 | FGGFL | K | E | V | R | E | N | G | G  | 22 | V | Y | D | D | T | A | V | L | N | R | W | L | D | V | T | E | K | D | K | N | S | R | S | A | T | F | N | T | L | P | L | H | D | N | H | F | P | G | V | S | K | T | A | D | Y | K | A | R | A | Q | K | F | F | D | E | L | D | A | F | F | T | E | L | E | K | S | G | R | K | V | M | V | V | V | V | P | E | H | G | G | A   | L | K   | 448 |
| <a href="#">BcsG Cv</a> | 298 | FDSFL | Q | I | R | R | N | G | R | 22 | I  | Y | S | D | A | M | L | N | R | W | L | Q | R | L | Q | E | P | D | P | H | V | A | Y | Y | N | T | I | S | L | H | D | G | N | R | I | S | E | A | 4 | T | D | A | S | Y | K | Y | R | A | G | R | L | L | R | D | I | G | F | I | D | L | L | E | Q | D | H | R | K | M | I | L | L | L | V | P | E | H | G | A | A | L | R | 419 |   |     |     |
| <a href="#">PF11658</a> | 289 | FDNFL | Q | L | I | R | E | N | G | G  | 23 | Y | D | D | L | A | V | L | N | R | W | L | Q | R | E | K | S | D | D | G | R | V | A | T | F | Y | N | T | I | S | L | H | D | G | N |   |   |   |   |   |   |   |   |   |   |   |   |   |   |   |   |   |   |   |   |   |   |   |   |   |   |   |   |   |   |   |   |   |   |   |   |   |   |   |   |   |   |   |   |   |   |     |   |     |     |

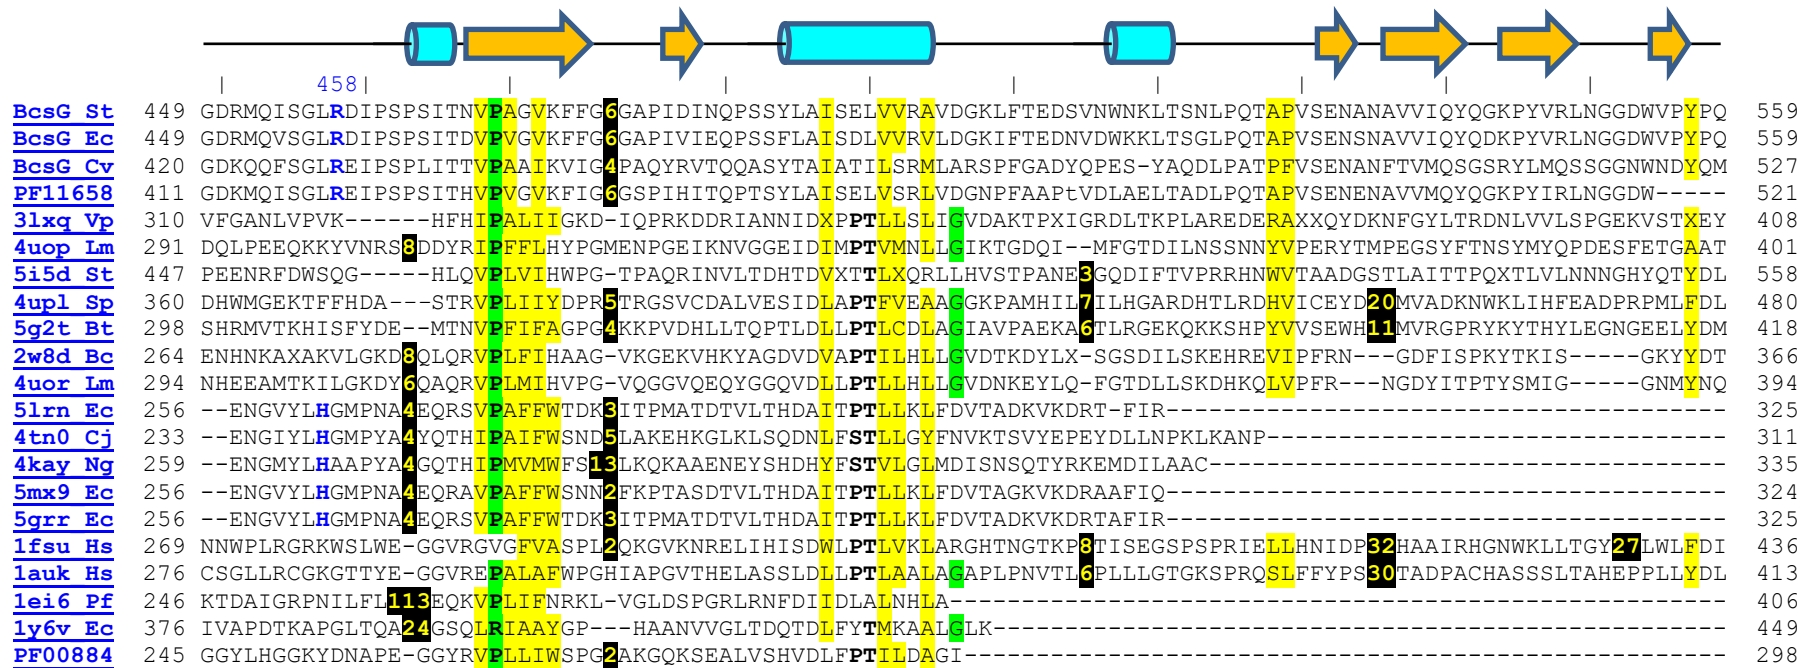

**Figure S10. Structure-based sequence alignment of the C-terminal soluble domain of BcsG and related members of the alkaline phosphatase superfamily.**

The top four rows include BcsG sequences from *S. typhimurium*, *E. coli*, and *Chromobacterium violaceum*, and from the Pfam domain PF11658, respectively. Subsequent rows include sequences of proteins with known structures, listed under their PDB identifiers and first letters of the genus and species names. All names are hyperlinked to the respective entries in the NCBI protein database. The last row shows the sequence of the Pfam domain Sulfatase (PF00884). The cylinders and arrows on the top indicate  $\alpha$ -helices and  $\beta$ -strands, respectively, of the BcsG structure calculated using the DSSP algorithm [10], vertical bars mark each 10<sup>th</sup> residue. The active site residues are in bold and colored red (Asp, Glu) or blue (His, Asn). Conserved hydrophobic residues are shaded yellow, conserved turn residues (Gly, Pro) are shaded green. The alignment was constructed by reconciling structural alignments generated by the DALI [11] and VAST [12] tools.

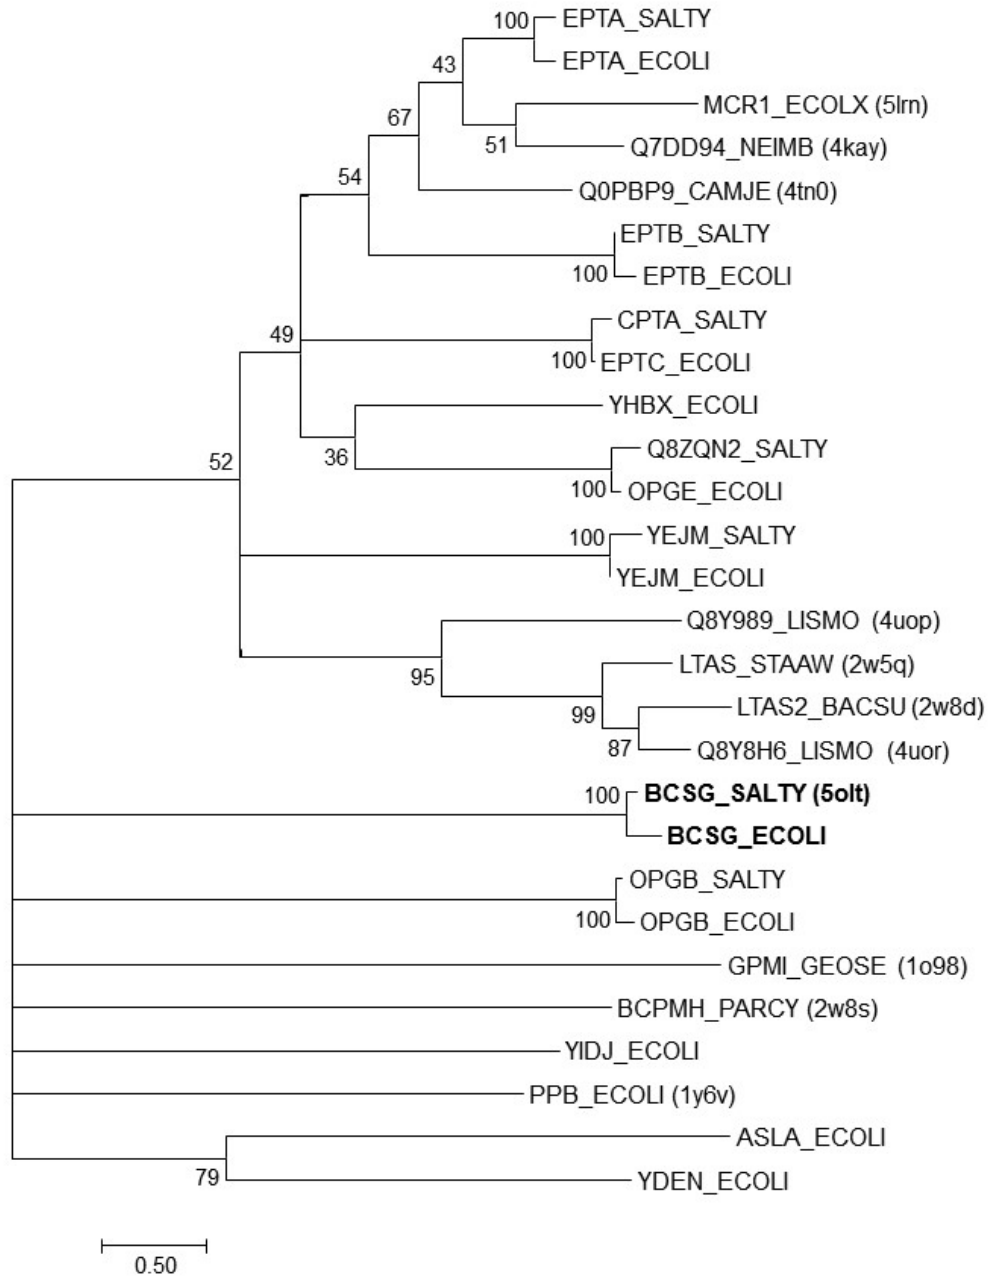

**Figure S11. Maximum likelihood tree of phosphoethanolamine transferases from *E. coli*, *S. typhimurium* and related members of the alkaline phosphatase superfamily.** Proteins are listed under their UniProt identifiers; PDB entries, where available, are shown in parentheses, see Tables 2 and S3 for details. The tree was constructed in MEGA7 [13] using the maximum likelihood method based on the JTT matrix-based model [14] with default parameters from an alignment built with MUSCLE [15]. All positions containing gaps were eliminated, leaving a total of 264 positions in the final dataset. The tree is drawn to scale, with branch lengths measured in the number of substitutions per site. The percentage of trees in which the associated taxa clustered together is shown next to the branches; those branches with <30% support have been collapsed.

**Table S1. Strains and plasmids used in this study**

| Strain or plasmid                                   | Relevant genotype or description                                                                                                    | Reference/ Source   |
|-----------------------------------------------------|-------------------------------------------------------------------------------------------------------------------------------------|---------------------|
| <b><i>E. coli</i> K-12</b>                          |                                                                                                                                     |                     |
| DH5 $\alpha$                                        | $\lambda\phi 80dlacZ \Delta M15 \Delta(lacZYA-argF)U169$<br><i>recA1 endA1 hsdR17(rK - mK - ) supE44</i><br><i>thi-1 gyrA relA1</i> | New England Biolabs |
| <b><i>S. Typhimurium</i> ATCC 14028 derivatives</b> |                                                                                                                                     |                     |
| UMR1                                                | ATCC14028-1s $Nal^r$ , cellulose/curli<br>fimbriae ( <i>rdar</i> ) 28 °C                                                            | [16]                |
| MAE14                                               | UMR1 $\Delta csgBA101::Km^r$ , cellulose<br>( <i>pdar</i> ) 28°C                                                                    | [6]                 |
| MAE50                                               | UMR1 $\Delta csgD$                                                                                                                  | [6]                 |
| MAE52                                               | UMR1 <i>pcsgD1</i> ; cellulose/curli fimbriae<br>( <i>rdar</i> ) 28/37 °C                                                           | [17]                |
| MAE97                                               | UMR1 <i>pcsgD1 \Delta csgBA102</i> , cellulose<br>( <i>pdar</i> ) 28/37 °C                                                          | [6]                 |
| MAE190                                              | MAE97 <i>bcsA101::MudJ</i> cellulose/curli<br>negative, ( <i>saw</i> ) 28/37 °C                                                     | [18]                |
| MAE1264                                             | MAE97 <i>bcsA-3xFLAG</i>                                                                                                            | [19]                |
| MAE1873                                             | UMR1 <i>bcsC-3xFLAG Km</i>                                                                                                          | [19]                |
| MAE2201                                             | UMR1 $\Delta bcsF::Cm$                                                                                                              | This study          |
| MAE2202                                             | UMR1 $\Delta bcsF::tetRA$                                                                                                           | This study          |
| MAE2204                                             | MAE14 $\Delta bcsF::Cm$                                                                                                             | This study          |
| MAE2205                                             | MAE14 $\Delta bcsF::tetRA$                                                                                                          | This study          |
| MAE2207                                             | MAE97 $\Delta bcsF::Cm$                                                                                                             | This study          |
| MAE2207                                             | MAE97 $\Delta bcsF::tetRA$                                                                                                          | This work           |
| MAE2203                                             | UMR1 $\Delta bcsG101$                                                                                                               | This study          |
| MAE2206                                             | MAE14 $\Delta bcsG101$                                                                                                              | This study          |
| MAE2209                                             | MAE97 $\Delta bcsG101$                                                                                                              | This study          |
| MAE2211                                             | MAE1264 $\Delta bcsG101$                                                                                                            | This study          |
| MAE2215                                             | UMR1 $\Delta bcsG-3xFLAG Km$                                                                                                        | This study          |
| MAE2217                                             | UMR1 $\Delta bcsG101 bcsC-3xFLAG Km$                                                                                                | This study          |
| <b>Plasmids</b>                                     |                                                                                                                                     |                     |
| pBAD30                                              | pACYC184 ori; L-arabinose regulated<br><i>araC</i> ; PBAD promoter; $Amp^r$                                                         | [20, 21]            |
| pLAFR3                                              | <i>IncP Tc<sup>r</sup> cos<sup>+</sup> rlx<sup>+</sup></i>                                                                          | [22]                |
| pKD3                                                | FRT-cat-FRT; $Cm^r$ , $Amp^r$                                                                                                       | [23]                |
| pKD46                                               | ParaB $\alpha\beta\gamma$ ; $Amp^r$                                                                                                 | [23]                |
| pSUB11                                              | template for 3xFLAG-Km                                                                                                              | [24]                |
| pBAD-BcsF                                           | <i>bcsF</i> cloned in <i>XbaI/HindIII</i> sites in<br>pBAD30 with a 8xHis-Tag                                                       | This study          |
| pBAD-BcsG                                           | <i>bcsG</i> cloned in <i>XbaI/HindIII</i> sites in<br>pBAD30 with a 8x His-Tag                                                      | This study          |

|                            |                                                            |                     |
|----------------------------|------------------------------------------------------------|---------------------|
| pBAD-BcsG <sub>C243S</sub> | pBAD30-BcsG <sub>C243S</sub> -8xHis                        | This study          |
| pBAD-BcsG <sub>E442A</sub> | pBAD30-BcsG <sub>E442A</sub> -8xHis                        | This study          |
| pBAD-BcsG <sub>S278A</sub> | pBAD30-BcsG <sub>S278A</sub> -8xHis                        | This study          |
| pBAD-BcsG <sub>H396A</sub> | pBAD30-BcsG <sub>H396A</sub> -8xHis                        | This study          |
| pBAD-BcsG <sub>H443A</sub> | pBAD30-BcsG <sub>H443A</sub> -8xHis                        | This study          |
| pBAD-BcsG <sub>S493A</sub> | pBAD30-BcsG <sub>S493A</sub> -8xHis                        | This study          |
| pBAD-BcsG <sub>1-165</sub> | pBAD30-BcsG (1-165 aa)-8xHis                               | This study          |
| pBAD-BcsG <sub>1-210</sub> | pBAD30-BcsG (1-210 aa)-8xHis                               | This study          |
| pMAL-c2x                   | MBP fusion overexpression vector;<br>plac,Amp <sup>r</sup> | New England Biolabs |
| pMAL-BcsG1                 | pMAL-c2x-BcsG1 (185-559 aa)                                | This study          |
| pMAL-BcsG2                 | pMAL-BcsG1 <sub>S278A</sub>                                | This study          |
| pWJB9 (pAdrA)              | pLAFR3:: <i>araC PBAD adrA</i>                             | [25]                |





|                                                            |                                              |
|------------------------------------------------------------|----------------------------------------------|
| BcsGR458M_F                                                | GAATGCAGATCTCAGGCCTGATGGATATTCCCAGCCCCTCCATC |
| BcsGR458M_R                                                | GATGGAGGGGCTGGGAATATCCATCAGGCCTGAGATCTGCATTC |
| BcsGR458H_F                                                | GCAGATCTCAGGCCTGCATGATATTCCCAGCCCCTC         |
| BcsGR458H_R                                                | GAGGGGCTGGGAATATCATGCAGGCCTGAGATCTGC         |
| <b>Cloning of <i>bcsG</i> in pMAL-c2 expression vector</b> |                                              |
| bcsGpMAL2-XbaIF                                            | GTATCTAGA GCGGGCGATAAGCCGG                   |
| bcsGpMAL2-HindIIIR                                         | TACAAGCTTTTACTGCGGGTAAGGCAC                  |

**Table S3. Phosphoethanolamine transferase family enzymes in *S. typhimurium***

| Protein name                                                       | UniProt entry, accession               | <i>S. typhimurium</i> LT2 locus tag | TM domain length <sup>b</sup> | Active site residue | Reference      |
|--------------------------------------------------------------------|----------------------------------------|-------------------------------------|-------------------------------|---------------------|----------------|
| <b>Phosphoethanolamine transferase</b>                             |                                        |                                     |                               |                     |                |
| Cellulose biosynthesis protein BcsG                                | BCSG_SALTY, <a href="#">Q7CPI7</a>     | STM3624                             | 162 aa, 5 TM                  | Ser                 | [5]; this work |
| Phosphoethanolamine transferase EptA                               | EPTA_SALTY, <a href="#">P36555</a>     | STM4293                             | 175 aa, 5 TM                  | Thr                 | [26, 27]       |
| Kdo <sub>2</sub> -lipid A phosphoethanolamine 7''-transferase EptB | EPTB_SALTY, <a href="#">P43666</a>     | STM3635                             | 180 aa, 5 TM                  | Thr                 | [28]           |
| Phosphoethanolamine transferase CptA                               | CPTA_SALTY, <a href="#">Q7CPC0</a>     | STM4118                             | 174 aa, 5 TM                  | Thr                 | [29]           |
| Integral membrane protein OpgE/YbiP                                | Q8ZQN2_SALTY, <a href="#">Q8ZQN2</a>   | STM0834                             | 158 aa, 4 TM                  | Thr                 | [30]           |
| Phosphoethanolamine transferase MCR-1 <sup>a</sup>                 | MCR1_ECOLX, <a href="#">A0A0R6L508</a> | N/A <sup>a</sup>                    | 178 aa, 5 TM                  | Thr                 | [31, 32]       |
| <b>Phosphoglycerol transferase</b>                                 |                                        |                                     |                               |                     |                |
| Phosphoglycerol transferase OpgB                                   | OPGB_SALTY, <a href="#">Q8ZJX6</a>     | STM4541                             | 132 aa, 4 TM                  | Thr                 | [31-33]        |
| <b>No known enzymatic activity</b>                                 |                                        |                                     |                               |                     |                |
| Cardiolipin transfer protein PbgA                                  | YEJM_SALTY, <a href="#">P40709</a>     | STM2228                             | 190 aa, 5 TM                  | N/A                 | [34]           |

<sup>a</sup> – This protein and its Arg536->His variant have been detected in recent environmental isolates of *S. typhimurium* (not in strain LT2 or its derivatives) [31, 32].

<sup>b</sup> – Transmembrane domain length and helices predictions are taken from UniProt and/or calculated using MEMSAT-SVM [35].

## References

- [1] J.L. Morgan, J. Strumillo, J. Zimmer. Crystallographic snapshot of cellulose synthesis and membrane translocation. *Nature* 493 (2013) 181-186.
- [2] I. Ahmad, S.F. Rouf, L. Sun, A. Cimdins, S. Shafeeq, S. Le Guyon, M. Schottkowski, M. Rhen, U. Romling. BcsZ inhibits biofilm phenotypes and promotes virulence by blocking cellulose production in *Salmonella enterica* serovar Typhimurium. *Microb Cell Fact* 15 (2016) 177.
- [3] U. Romling, M.Y. Galperin. Bacterial cellulose biosynthesis: diversity of operons, subunits, products, and functions. *Trends Microbiol* (2015).
- [4] X. Fang, I. Ahmad, A. Blanka, M. Schottkowski, A. Cimdins, M.Y. Galperin, U. Romling, M. Gomelsky. GIL, a new c-di-GMP-binding protein domain involved in regulation of cellulose synthesis in enterobacteria. *Mol Microbiol* 93 (2014) 439-452.
- [5] W. Thongsomboon, D.O. Serra, A. Possling, C. Hadjineophytou, R. Hengge, L. Cegelski. Phosphoethanolamine cellulose: A naturally produced chemically modified cellulose. *Science* 359 (2018) 334-338.
- [6] U. Römling, M. Rohde, A. Olsen, S. Normark, J. Reinkoster. AgfD, the checkpoint of multicellular and aggregative behaviour in *Salmonella typhimurium* regulates at least two independent pathways. *Mol. Microbiol.* 36 (2000) 10-23.
- [7] A. Anandan, G.L. Evans, K. Condic-Jurkic, M.L. O'Mara, C.M. John, N.J. Phillips, G.A. Jarvis, S.S. Wills, K.A. Stubbs, I. Moraes, C.M. Kahler, A. Vrielink. Structure of a lipid A phosphoethanolamine transferase suggests how conformational changes govern substrate binding. *Proc. Natl. Acad. Sci. USA* 114 (2017) 2218-2223.
- [8] U. Omasits, C.H. Ahrens, S. Muller, B. Wollscheid. Protter: interactive protein feature visualization and integration with experimental proteomic data. *Bioinformatics* 30 (2014) 884-886.
- [9] L. Zimmermann, A. Stephens, S.Z. Nam, D. Rau, J. Kübler, M. Lozajic, F. Gabler, J. Söding, A.N. Lupas, V. Alva. A completely reimplemented MPI Bioinformatics toolkit with a new HHpred server at its core. *J. Mol. Biol.* 430 (2018) 2237-2243.
- [10] W.G. Touw, C. Baakman, J. Black, T.A. te Beek, E. Krieger, R.P. Joosten, G. Vriend. A series of PDB-related databanks for everyday needs. *Nucleic Acids Res.* 43 (2015) D364-D368.
- [11] L. Holm, L.M. Laakso. Dali server update. *Nucleic Acids Res.* 44 (2016) W351-W355.
- [12] T. Madej, C.J. Lanczycki, D. Zhang, P.A. Thiessen, R.C. Geer, A. Marchler-Bauer, S.H. Bryant. MMDB and VAST+: tracking structural similarities between macromolecular complexes. *Nucleic Acids Res.* 42 (2014) D297-D303.
- [13] S. Kumar, G. Stecher, K. Tamura. MEGA7: Molecular Evolutionary Genetics Analysis version 7.0 for bigger datasets. *Mol. Biol. Evol.* 33 (2016) 1870-1874.
- [14] D.T. Jones, W.R. Taylor, J.M. Thornton. The rapid generation of mutation data matrices from protein sequences. *Comput. Appl. Biosci.* 8 (1992) 275-282.
- [15] R.C. Edgar. MUSCLE: multiple sequence alignment with high accuracy and high throughput. *Nucleic Acids Res.* 32 (2004) 1792-1797.
- [16] U. Römling, Z. Bian, M. Hammar, W.D. Sierralta, S. Normark. Curli fibers are highly conserved between *Salmonella typhimurium* and *Escherichia coli* with respect to operon structure and regulation. *J. Bacteriol.* 180 (1998) 722-731.
- [17] U. Römling, W.D. Sierralta, K. Eriksson, S. Normark. Multicellular and aggregative behaviour of *Salmonella typhimurium* strains is controlled by mutations in the *agfD* promoter. *Mol. Microbiol.* 28 (1998) 249-264.

- [18] X. Zogaj, M. Nimtz, M. Rohde, W. Bokranz, U. Römling. The multicellular morphotypes of *Salmonella typhimurium* and *Escherichia coli* produce cellulose as the second component of the extracellular matrix. *Mol. Microbiol.* 39 (2001) 1452-1463.
- [19] I. Ahmad, S.F. Rouf, L. Sun, A. Cimdins, S. Shafeeq, S. Le Guyon, M. Schottkowski, M. Rhen, U. Römling. BcsZ inhibits biofilm phenotypes and promotes virulence by blocking cellulose production in *Salmonella enterica* serovar Typhimurium. *Microb. Cell Fact.* 15 (2016) 177.
- [20] L.M. Guzman, D. Belin, M.J. Carson, J. Beckwith. Tight regulation, modulation, and high-level expression by vectors containing the arabinose P<sub>BAD</sub> promoter. *J. Bacteriol.* 177 (1995) 4121-4130.
- [21] I. Ahmad, A. Cimdins, T. Beske, U. Römling. Detailed analysis of c-di-GMP mediated regulation of *csgD* expression in *Salmonella typhimurium*. *BMC Microbiol.* 17 (2017) 27.
- [22] B. Staskawicz, D. Dahlbeck, N. Keen, C. Napoli. Molecular characterization of cloned avirulence genes from race 0 and race 1 of *Pseudomonas syringae* pv. *glycinea*. *J. Bacteriol.* 169 (1987) 5789-5794.
- [23] K.A. Datsenko, B.L. Wanner. One-step inactivation of chromosomal genes in *Escherichia coli* K-12 using PCR products. *Proc. Natl. Acad. Sci. USA* 97 (2000) 6640-6645.
- [24] S. Uzzau, N. Figueroa-Bossi, S. Rubino, L. Bossi. Epitope tagging of chromosomal genes in *Salmonella*. *Proc. Natl. Acad. Sci. USA* 98 (2001) 15264-15269.
- [25] R. Simm, M. Morr, A. Kader, M. Nimtz, U. Römling. GGDEF and EAL domains inversely regulate cyclic di-GMP levels and transition from sessility to motility. *Mol. Microbiol.* 53 (2004) 1123-1134.
- [26] Z. Zhou, A.A. Ribeiro, S. Lin, R.J. Cotter, S.I. Miller, C.R. Raetz. Lipid A modifications in polymyxin-resistant *Salmonella typhimurium*: PmrA-dependent 4-amino-4-deoxy-L-arabinose, and phosphoethanolamine incorporation. *J. Biol. Chem.* 276 (2001) 43111-43121.
- [27] H. Lee, F.F. Hsu, J. Turk, E.A. Groisman. The PmrA-regulated *pmrC* gene mediates phosphoethanolamine modification of lipid A and polymyxin resistance in *Salmonella enterica*. *J. Bacteriol.* 186 (2004) 4124-4133.
- [28] C.M. Reynolds, S.R. Kalb, R.J. Cotter, C.R. Raetz. A phosphoethanolamine transferase specific for the outer 3-deoxy-D-manno-octulosonic acid residue of *Escherichia coli* lipopolysaccharide. Identification of the *eptB* gene and Ca<sup>2+</sup> hypersensitivity of an *eptB* deletion mutant. *J. Biol. Chem.* 280 (2005) 21202-21211.
- [29] R. Tamayo, B. Choudhury, A. Septer, M. Merighi, R. Carlson, J.S. Gunn. Identification of *cptA*, a PmrA-regulated locus required for phosphoethanolamine modification of the *Salmonella enterica* serovar *typhimurium* lipopolysaccharide core. *J. Bacteriol.* 187 (2005) 3391-3399.
- [30] S. Bontemps-Gallo, V. Coge, C. Robbe-Masselot, K. Quintard, J. Dondeyne, E. Madec, J.M. Lacroix. Biosynthesis of osmoregulated periplasmic glucans in *Escherichia coli*: the phosphoethanolamine transferase is encoded by *opgE*. *Biomed. Res. Int.* 2013 (2013) 371429.
- [31] M. Doumith, G. Godbole, P. Ashton, L. Larkin, T. Dallman, M. Day, B. Muller-Pebody, M.J. Ellington, E. de Pinna, A.P. Johnson, K.L. Hopkins, N. Woodford. Detection of the plasmid-mediated *mcr-1* gene conferring colistin resistance in

- human and food isolates of *Salmonella enterica* and *Escherichia coli* in England and Wales. *J. Antimicrob. Chemother.* 71 (2016) 2300-2305.
- [32] X. Lu, Y. Hu, M. Luo, H. Zhou, X. Wang, Y. Du, Z. Li, J. Xu, B. Zhu, X. Xu, B. Kan. MCR-1.6, a new MCR variant carried by an IncP plasmid in a colistin-resistant *Salmonella enterica* serovar Typhimurium isolate from a healthy individual. *Antimicrob. Agents Chemother.* 61 (2017) e02632-02616.
- [33] A.A. Bhagwat, P. Kannan, Y.N. Leow, M. Dharne, A. Smith. Role of anionic charges of osmoregulated periplasmic glucans of *Salmonella enterica* serovar Typhimurium SL1344 in mice virulence. *Arch. Microbiol.* 194 (2012) 541-548.
- [34] H. Dong, Z. Zhang, X. Tang, S. Huang, H. Li, B. Peng, C. Dong. Structural insights into cardiolipin transfer from the Inner membrane to the outer membrane by PbgA in Gram-negative bacteria. *Sci. Rep.* 6 (2016) 30815.
- [35] T. Nugent, D.T. Jones. Detecting pore-lining regions in transmembrane protein sequences. *BMC Bioinform.* 13 (2012) 169.
